# Supplementary material
Source: PubMed Central journal article supplement (PMC2901531)
Supplement: NIHMS212141-supplement-02.pdf [file NIHMS212141-supplement-02.pdf]

## SUPPLEMENTAL TABLE 1

Statistics from the crystallographic analysis.

| Data Set              | Native      |
|-----------------------|-------------|
| Diffraction Data      |             |
| Wavelength (Å)        | 1.000       |
| Resolution (Å)        | 50 – 2.70   |
| Observations          | 210206      |
| Unique reflections    | 22908       |
| Redundancy            | 9.2         |
| Completeness (%)      | 93.9 (64.4) |
| Overall $I/\sigma$    | 35.3 (3.1)  |
| $R_{\text{sym}}$ (%)  | 9.2 (30.4)  |
| Refinement Statistics |             |
| Resolution limits (Å) | 50 – 2.70   |
| Total Atoms           | 5490        |
| R-factor (%)          | 23.1        |
| R-free (%)            | 29.7        |
| RMSD bonds (Å)        | 0.008       |
| RMSD angles (°)       | 1.64        |
| Ramachandran Plot     |             |
| Favored (%)           | 95.9        |
| Disallowed (%)        | 0.0         |

## SUPPLEMENTAL TABLE 2

*Saccharomyces cerevisiae* strains and plasmids

| Yeast Strain                      | Genotype                                                                                                                    | Source              |
|-----------------------------------|-----------------------------------------------------------------------------------------------------------------------------|---------------------|
| W303                              | <i>MAT a, trp1-1 ade2-1 ura3-1 leu2-3,112 his3-11,15 can1-100</i>                                                           | Euroscarf           |
| W303 <i>gcn5</i> Δ                | <i>MAT a, trp1-1 ade2-1 ura3-1 leu2-3,112 his3-11,15 can1-100 gcn5Δ::kanMX4</i>                                             | This study          |
| W303 <i>sgf11</i> Δ               | <i>MAT a, trp1-1 ade2-1 ura3-1 leu2-3,112 his3-11,15 can1-100 sgf11Δ::kanMX4</i>                                            | This study          |
| W303 <i>gcn5</i> Δ <i>sgf11</i> Δ | <i>MAT a, trp1-1 ade2-1 ura3-1 leu2-3,112 his3-11,15 can1-100 gcn5Δ::kanMX4 sgf11Δ::natNT2</i>                              | This study          |
| W303 <i>gcn5</i> Δ <i>sgf73</i> Δ | <i>MAT a, trp1-1 ade2-1 ura3-1 leu2-3,112 his3-11,15 can1-100 gcn5Δ::kanMX4 sgf73Δ::natNT2</i>                              | This study          |
| YZS276                            | <i>MATa his3-11,-15 leu2-3,112 trp1-1 ura3-1 ade2-1 hta-1 htb1::LEU2 hta2-htb2:: + pRS413-FLAG-HTB1-HTA1</i>                | Robzyk et al., 2000 |
| YZS276 <i>ubp8</i> Δ              | <i>MATa his3-11,-15 leu2-3,112 trp1-1 ura3-1 ade2-1 hta-1 htb1::LEU2 hta2-htb2:: + pRS413-FLAG-HTB1-HTA1 ubp8Δ::natNT2</i>  | Köhler et al., 2008 |
| YZS276 <i>sgf11</i> Δ             | <i>MATa his3-11,-15 leu2-3,112 trp1-1 ura3-1 ade2-1 hta-1 htb1::LEU2 hta2-htb2:: + pRS413-FLAG-HTB1-HTA1 sgf11Δ::natNT2</i> | This study          |
| ADA2-TAP <i>sgf73</i> Δ           | <i>Mat a, ade2, arg4, leu2-3,112, ura3-52, trp1-289, ADA2-TAP::K.I. URA3, SUS1-13MYC::KanMX4 sgf73D::natNT2</i>             | This study          |

| Plasmids Yeast | Source |
|----------------|--------|
|----------------|--------|

|             |            |
|-------------|------------|
| pRS316-GCN5 | This study |
|-------------|------------|

|                                 |            |
|---------------------------------|------------|
| pRS314-SGF11*                   | This study |
| pRS314- <i>sgf11</i> L85D*      | This study |
| pRS314- <i>sgf11</i> A86D*      | This study |
| pRS314- <i>sgf11</i> L89D*      | This study |
| pRS314- <i>sgf11</i> A86D L89D* | This study |
| pRS314- <i>sgf11</i> R84A*      | This study |
| pRS314- <i>sgf11</i> R91A*      | This study |
| pRS314- <i>sgf11</i> R84A R91A* | This study |
| pRS314- <i>sgf11</i> R84A A86D* | This study |

\*also with C-terminal 6HIS tag

|                                     |            |
|-------------------------------------|------------|
| pRS314-SGF73                        | This study |
| pRS314- <i>sgf73</i> ΔN aa1-104     | This study |
| pRS314- <i>sgf73</i> W32R K33A      | This study |
| pRS314- <i>sgf73</i> H93A           | This study |
| pRS314- <i>sgf73</i> W32R K33A H93A | This study |
